# Supplementary material for: IGF-1 and IGF-2 as Molecules Linked to Causes and Consequences of Obesity from Fetal Life to Adulthood: A Systematic Review
Source: MDPI journal article supplement (doi:10.3390/ijms25073966), 2024-04-02
Supplement: s1 [file s1]

**Table S1.** IGF-1 and IGF-2 values (ng/mL) during child development.

| Reference | Study group                                                                                                  | Country          | Age (mean; years, unless marked differently) | Age (range; years, unless marked differently) | Pubertal status | IGF-1 (mean; ng/mL)                                             | IGF-1 (range; ng/mL)                | IGF-2 (ng/mL)         |
|-----------|--------------------------------------------------------------------------------------------------------------|------------------|----------------------------------------------|-----------------------------------------------|-----------------|-----------------------------------------------------------------|-------------------------------------|-----------------------|
| 4         | 574 obese children                                                                                           | Italy            | 11.34                                        |                                               |                 | 353.5 - 363.9                                                   |                                     | 656.6- 704.7          |
| 19        | 269 infants born to non-obese mothers (1), 130 infants born to obese mothers (2), heavier than (1) (p=0,020) | Denmark          | 9-months                                     | 9-months                                      |                 | 48.1 (1),<br>34.7 (2)                                           | 35.4-60.2 (1),<br>26.0- 46.4 (2)    |                       |
| 22        | 577 infants born to obese mothers                                                                            | UK               | cord blood                                   |                                               |                 | 45.0                                                            |                                     | 496.0                 |
| 2         | 28 obese children (1), 34 healthy (2) children                                                               | Poland           | 13.7 (1),<br>11.8 (2)                        | 4–17.8 (1),<br>4.3–16.9 (2)                   |                 | 299 (1),<br>231 (2)                                             |                                     | 51.95 (1),<br>107 (2) |
| 24        | 611 normal weight (1), 50 obese (2) girls                                                                    | India            | 11.7                                         | 5-18                                          |                 | 368.9 (1),<br>332.2(2)                                          | 335.9–371.5 (1),<br>286.6–377.8 (2) |                       |
| 26        | 84 obese (1), 43 non-obese (2) children                                                                      | China            | 4-18                                         |                                               |                 | 180.5 (1),<br>315 (2)                                           | 128.75–268.5 (1),<br>185–460 (2)    |                       |
| 27        | 78 obese (1), 30 non-obese (2) children                                                                      | China            | 12.24 (1),<br>11.7 (2)                       |                                               |                 | 268.36 (1),<br>390.25 (2)                                       |                                     |                       |
| 28        | 53 normal weight (1), 48 overweight or obese (2) children                                                    | Puerto Rico, USA | 15.3 (1),<br>14.9 (2).                       | 12-18                                         |                 | 272.1 (1),<br>216.3 (2)                                         | 186.6-384.0 (1),<br>166.5-263.1 (2) |                       |
| 30        | 2059 healthy children                                                                                        | Germany          |                                              | 0.14-18.89                                    |                 | peak in Tanner scale (TS)<br>4:<br>boys: 387.4,<br>girls: 336.3 |                                     |                       |
| 3         | 107 normal-weight (1), 81 overweight/obese (2) children                                                      | Germany          | 11.05 (1)<br>12.89 (2)                       |                                               |                 | 198.87 (1),<br>284.19 (2)                                       | 32.3-484.6 (1),<br>38.5-549.4 (2)   |                       |
| 31        | 33 normal-weight (1), 28 obese (2) children                                                                  | Montenegro       |                                              | 9-12                                          |                 | 177.4 (1),<br>227.45 (2)                                        | 121.9-239.2 (1),<br>160.1-426.3 (2) |                       |
| 32        | 23 obese and overweight (1), 11 normal-weight (2) children                                                   | Italy            |                                              | 3-10                                          | prepubertal     | 205.27 (1),<br>155.67 (2)                                       |                                     |                       |

|    |                                                                              |         |                                |                                |                                       |                                                                                                                                                                                                                                                                                                     |                                     |
|----|------------------------------------------------------------------------------|---------|--------------------------------|--------------------------------|---------------------------------------|-----------------------------------------------------------------------------------------------------------------------------------------------------------------------------------------------------------------------------------------------------------------------------------------------------|-------------------------------------|
| 34 | 24 non-obese (1), 43 obese (2) children                                      | Spain   |                                | 3-14                           |                                       | 86.7 (1),<br>165 (2)                                                                                                                                                                                                                                                                                | 58.7-154 (1),<br>129.2-272.7 (2)    |
| 35 | 2341 normal weight (1), 278 obese (2) children                               | China   | 8.6 (1),<br>9.4 (2)            | 2.0-17.6 (1),<br>2.4-15.6 (2)  |                                       | 207.2 (1),<br>281.1 (2)                                                                                                                                                                                                                                                                             | 25.0-405.0 (1),<br>31.9-796.0 (2)   |
| 36 | 45 obese (1),<br>20 normal-weight (2) children                               | Poland  | 7.8 (1),<br>7.7 (2)            | 4-10                           | prepubertal                           | 147.0 (1),<br>132.3 (2)                                                                                                                                                                                                                                                                             | 120.8-179.6 (1),<br>100.0-151.2 (2) |
| 37 | 61 normal-weight (1),<br>28 obese (2) children with idiopathic short stature | Poland  | 10.99                          |                                |                                       | 194.37 (1),<br>252.02 (2)                                                                                                                                                                                                                                                                           |                                     |
| 38 | 231 non-obese (1),<br>229 non-obese (2) children                             | Denmark | 9 months (1),<br>36 months (2) | 9 months (1),<br>36 months (2) |                                       | 47.8 (1),<br>72.6 (2)                                                                                                                                                                                                                                                                               | 33.8-63.7 (1),<br>44.2-108.0 (2) *  |
| 39 | 115 healthy children                                                         | Denmark | 9 months (1),<br>18 months (2) | 9 months (1),<br>18 months (2) |                                       | 49.3 (1),<br>62.9 (2) *                                                                                                                                                                                                                                                                             |                                     |
| 40 | 215 overweight, 661 obese children                                           | Italy   | 10.6                           |                                | prepubertal and pubertal              | 268.5                                                                                                                                                                                                                                                                                               |                                     |
| 42 | 20 obese (1),<br>20 non-obese (2) children                                   | Italy   | 11.2 (1),<br>10.3 (2)          |                                |                                       | 315.4 (1),<br>195.9 (2)                                                                                                                                                                                                                                                                             |                                     |
| 43 | 61 obese children                                                            | USA     | 14.4                           |                                | most in late puberty<br>TS 4-5        | 321                                                                                                                                                                                                                                                                                                 |                                     |
| 44 | 972 obese and non-obese children                                             | Chile   | 7                              | 7                              | prepubertal                           | 182.25                                                                                                                                                                                                                                                                                              |                                     |
| 46 | 56 normal weight,<br>91 obese children                                       | USA     |                                | 3-18.4                         | prepubertal, in-puberty, postpubertal | normal weight children<br>[TS; girls, boys]:<br>TS1; 177.0, 144.7<br>TS2; 242.5, 196.0<br>TS3; 295.5, 297.7<br>TS4; 429.0, 320.5<br>TS5; 415.0, 320.5<br>Obese children [TS; girls, boys]:<br>TS1; 187.5, 148.2<br>TS2; 191.3, 211.0<br>TS3; 299.5, 241.1<br>TS4; 430.0, 404.0<br>TS5; 339.0, 310.3 |                                     |

|    |                                                                |         |                                                                                                                               |            |                                     |                                                                                           |                          |
|----|----------------------------------------------------------------|---------|-------------------------------------------------------------------------------------------------------------------------------|------------|-------------------------------------|-------------------------------------------------------------------------------------------|--------------------------|
| 47 | 633 under-, normal- and over-weight (including obese) children | Denmark |                                                                                                                               | 8-11 years | prepubertal and pubertal            | girls: 211, boys: 180                                                                     |                          |
| 49 | 60 obese children                                              | Germany | 12.0                                                                                                                          |            | prepubertal and early pubertal T2-3 | 291                                                                                       |                          |
| 50 | 943 children                                                   | Chile   | 6.7                                                                                                                           |            | prepubertal T1                      | 184.5 (girls: 176.7, boys: 189.3) *                                                       |                          |
| 51 | 2695 normal weight (1), 392 obese children (2)                 | Germany |                                                                                                                               | 0-20.3     |                                     | 195.6 (1), 236.1 (2)                                                                      | 20-908 (1), 38.5-624 (2) |
| 55 | 105 overweight children                                        | Germany | Girls: 10.3 and 11.3 (while entering puberty, one year later)<br>Boys: 11.9 and 12.9 (while entering puberty, one year later) |            | prepubertal and in entry to puberty | Girls: baseline 215, entry into puberty 377<br>Boys: baseline 218, entry into puberty 337 |                          |

\* Own calculations based on given data.
